# Supplementary material
Source: PubMed Central journal article supplement (PMC9617931)
Supplement: 41525_2022_335_MOESM1_ESM.pdf [file 41525_2022_335_MOESM1_ESM.pdf]

## Supplementary information

**Supplementary Table 1. Laboratory features of two patients with HHS**

|                                                          | Age (yr) | Elder brother | Younger brother | Reference            |
|----------------------------------------------------------|----------|---------------|-----------------|----------------------|
| WBC (/μL)                                                | 1.6      | -             | 7240            | 5000-17000 (age 1-6) |
|                                                          | 2.8      | 1050 L        | 7450            |                      |
|                                                          | 3        | 2560 L        | 7620            |                      |
|                                                          | 3.5      | -             | 3060 L          |                      |
|                                                          | 5.7      | -             | 1030 L          |                      |
| Hb (g/dL)                                                | 1.6      | -             | 13.8 L          | 11.5-14 (age 1-6)    |
|                                                          | 2.8      | 9.8 L         | 10.1 L          |                      |
|                                                          | 3        | 2.6 L         | 12.6            |                      |
|                                                          | 3.5      | -             | 10.3 L          |                      |
|                                                          | 5.7      | -             | 8.6 L           |                      |
| PLT (k/μL)                                               | 1.6      | -             | 102 L           | 150-400 (age 1-6)    |
|                                                          | 2.8      | 35 L          | 40 L            |                      |
|                                                          | 3        | 4 L           | 107 L           |                      |
|                                                          | 3.5      | -             | 76 L            |                      |
|                                                          | 5.7      | -             | 36 L            |                      |
| Neutrophils (/μL)                                        | 1.6      | --            | 4699            | 1000-8500 (age 1-6)  |
|                                                          | 2.8      | 473 L         | 6362            |                      |
|                                                          | 3        | 2289          | 5600            |                      |
|                                                          | 3.5      | -             | 1888            |                      |
|                                                          | 5.7      | -             | 900 L           |                      |
| Lymphocytes (/μL)                                        | 1.6      | -             | 1499 L          | 2180-8270 (age 1-2)  |
|                                                          | 2.8      | 74 L          | 693 L           | 2400-5810 (age 2-5)  |
|                                                          | 3        | 90 L          | 1227 L          |                      |
|                                                          | 3.5      | -             | 930 L           |                      |
|                                                          | 5.7      | -             | 50 L            |                      |
| Monocytes (/μL)                                          | 1.6      | -             | 557             | 200-1000 (age 1-6)   |
|                                                          | 2.8      | 158 L         | 261             |                      |
|                                                          | 3        | 161 L         | 617             |                      |
|                                                          | 3.5      | -             | 211             |                      |
|                                                          | 5.7      | -             | 70 L            |                      |
| CD3 <sup>+</sup> T cells (/μL)                           | 2.8      | 64.8 L        | 857.5 L         | 1610-4230 (age 2-5)  |
|                                                          | 3.5      | -             | 865.1 L         |                      |
| CD4 <sup>+</sup> T cells (/μL)                           | 2.8      | 46.8 L        | 551.2 L         | 900-2860 (age 2-5)   |
|                                                          | 3.5      | -             | 567.5 L         |                      |
| Naïve CD4 <sup>+</sup> CD45RA <sup>+</sup> T cells (/μL) | 2.8      | 43.2 L        | 408.3           | 300-2300 (age 2-5)   |
|                                                          | 3.5      | -             | 460.5           |                      |
| CD8 <sup>+</sup> T cells (/μL)                           | 2.8      | 16.5 L        | 316.4 L         | 630-1910 (age 2-5)   |

|                                  |     |         |         |                    |
|----------------------------------|-----|---------|---------|--------------------|
|                                  | 3.5 |         | 279.1 L |                    |
| CD19 <sup>+</sup> B cells (/μL)  | 2.8 | 0.5 L   | 122.5 L | 700-1300 (age 2-5) |
|                                  | 3.5 | -       | 46.5 L  |                    |
| CD56 <sup>+</sup> NK cells (/μL) | 2.8 | 6.0 L   | 20.4 L  | 61-510 (age 2-5)   |
|                                  | 3.5 | -       | 18.6 L  |                    |
| IgG (mg/dL)                      | 2.5 | 337.0 L | -       | 419-1274 (age 2-3) |
|                                  | 2.8 | 673     | 774     |                    |
|                                  | 3.5 | -       | 1150    | 569-1597 (age 3-5) |
|                                  | 5.3 | -       | 1050    |                    |
| IgA (mg/dL)                      | 2.8 | 110     | 33.4    | 19-235 (age 2-3)   |
|                                  | 3.5 | -       | 38.1    | 55-152 (age 3-5)   |
|                                  | 5.3 | -       | 25.9 L  |                    |
| IgM (mg/dL)                      | 2.8 | 37.6    | 133 H   | 28-113 (age 2-3)   |
|                                  | 3.5 | -       | 309 H   | 22-100 (age 3-5)   |
|                                  | 5.3 | -       | 118     |                    |

Abbreviations: high, H; low, L

**Supplementary Table 2. Oligonucleotides used for sequencing the *DKC1* gene**

| Name        | Sequence                 | Target |
|-------------|--------------------------|--------|
| CKOligo-315 | FW: TCAAGGCTTCTTGGATTTGG | DKC1   |
| CKOligo-316 | RV: AAGAGTAACAAAGCTGGTAC |        |

**Supplementary Table 3. Oligonucleotides used for qPCR and standard templates**

| Name        | Oligomer sequence (5' – 3')      | Description            |
|-------------|----------------------------------|------------------------|
| CKOligo-237 | TTAGGGTTAGGGTTAGGGTTAGGGTTAGG    | Telomere<br>Standard   |
|             | GTTAGGGTTAGGGTTAGGGTTAGGGTTAG    |                        |
|             | GGTTAGGGTTAGGGTTAGGGTTAGGG       |                        |
| CKOligo-238 | CAGCAAGTGGGAAGGTGTAATCCGTCTCC    | 36B4 (SCG)<br>Standard |
|             | ACAGACAAGGCCAGGACTCGTTTGTACC     |                        |
|             | CGTTGATGATAGAATGGG               |                        |
| CKOligo-239 | CGGTTTGTGGTTGGGTTTGGGTTTGGGTTTGG | Telomere-F             |
|             | GGTTTGGGTT                       |                        |

|             |                                             |              |
|-------------|---------------------------------------------|--------------|
| CKOligo-240 | GGCTTGCCTTACCCTTACCCTTACCCTTAC<br>CCTTACCCT | Telomere-R   |
| CKOligo-241 | CAGCAAGTGGGAAGGTGTAATCC                     | 36B4 (SCG)-F |
| CKOligo-242 | CCCATTCTATCATCAACGGGTACAA                   | 36B4 (SCG)-R |

**Supplementary Table 4. Oligonucleotides used for RT-PCR**

| Name  | Sequence                | Target |
|-------|-------------------------|--------|
| OCT4  | F: TGTACTCCTCGGTCCCTTTC | OCT4   |
|       | R: TCCAGGTTTTCTTTCCTAGC |        |
| SOX2  | F: GCTAGTCTCCAAGCGACGAA | SOX2   |
|       | R: GCAAGAAGCCTCTCCTTGAA |        |
| NANOG | F: CAGTCTGGACACTGGCTGAA | NANOG  |
|       | R: CTCGCTGATTAGGCTCCAAC |        |

**Supplementary Table 5. Oligonucleotides used for qRT-PCR**

| Name       | Sequence                   | Target       |
|------------|----------------------------|--------------|
| CKOligo-14 | FW: GCGAAGAGTTGGGCTCTGTCA  | hTR          |
| CKOligo-15 | RV: TTCCTCTTCCTGCGGCCTGAAA |              |
| CKOligo-18 | FW: TGCTGAGGATTTGGAAAGGG   | HPRT         |
| CKOligo-19 | RV: ACAGAGGGCTACAATGTGATG  |              |
| CKOligo-20 | FW: GATCCTCTAGACTCCACCTCTC | ATP5 $\beta$ |
| CKOligo-21 | RV: AGAAAGTTCATCCATACCCAGG |              |
| CKOligo-22 | FW: ACATCGCTCAGACACCATG    | GAPDH        |
| CKOligo-23 | RV: TGTAGTTGAGGTCAATGAAGGG |              |

**Supplementary Table 6. Oligonucleotides used for probe for Northern blotting**

| Name      | Sequences                      |                      | Target                              |
|-----------|--------------------------------|----------------------|-------------------------------------|
| CKOligo-1 | FW                             | GGGTTGCGGAGGGTGGGC   | hTR<br>probe<br>generated<br>by PCR |
| CKOligo-2 | RV                             | CCGACTTTGGAGGTGCCTTC |                                     |
| CKOligo-5 | GGAGGTCACCATATTGATGCCGAACTTAGT |                      | 7SL probe                           |

**Supplementary Table 7. Antibodies used for Western blotting**

| Antibodies                                          | Source              | Cat. No.   | Dilution |
|-----------------------------------------------------|---------------------|------------|----------|
| <b>Loading control</b>                              |                     |            |          |
| $\alpha$ -Tubulin                                   | ABclonal            | AC012      | 1:5000   |
| <b>Nuclear and cytosolic marker</b>                 |                     |            |          |
| Lamin A/C                                           | ABclonal            | A19524     | 1:50000  |
| GAPDH                                               | ABclonal            | AC027      | 1:100000 |
| <b>Secondary antibody</b>                           |                     |            |          |
| Goat anti-Mouse IgG- h+1<br>DyLight® 680 conjugated | Bethyl Laboratories | A90-516D6  | 1:5000   |
| Goat anti-Rabbit IgG<br>(H+L)-HRP                   | CROYEZ              | C04003     | 1:5000   |
| <b>Primary antibody</b>                             |                     |            |          |
| DKC1                                                | Bethyl Laboratories | A302-591A  | 1:2000   |
| NOP10                                               | ABclonal            | A18250     | 1:1000   |
| NHP2                                                | Proteintech Group   | 15128-1-AP | 1:500    |
| TERT                                                | Abcam               | ab32020    | 1:1000   |

**Supplementary Table 8. Antibodies used for immunofluorescence assays**

| <b>Antibodies</b>                                                         | <b>Source</b>               | <b>Cat. No.</b> | <b>Dilution</b> |
|---------------------------------------------------------------------------|-----------------------------|-----------------|-----------------|
| <b>Primary antibody</b>                                                   |                             |                 |                 |
| Dyskerin (H-3)                                                            | Santa Cruz<br>Biotechnology | sc-373956       | 1:500           |
| <b>Secondary antibody</b>                                                 |                             |                 |                 |
| Fluorescein (FITC)-<br>conjugated AffiniPure Goat<br>Anti-Mouse IgG (H+L) | Jackson<br>ImmunoResearch   | 115-095-003     | 1:100           |

# Supplementary Figure

## Supplementary Figure 1

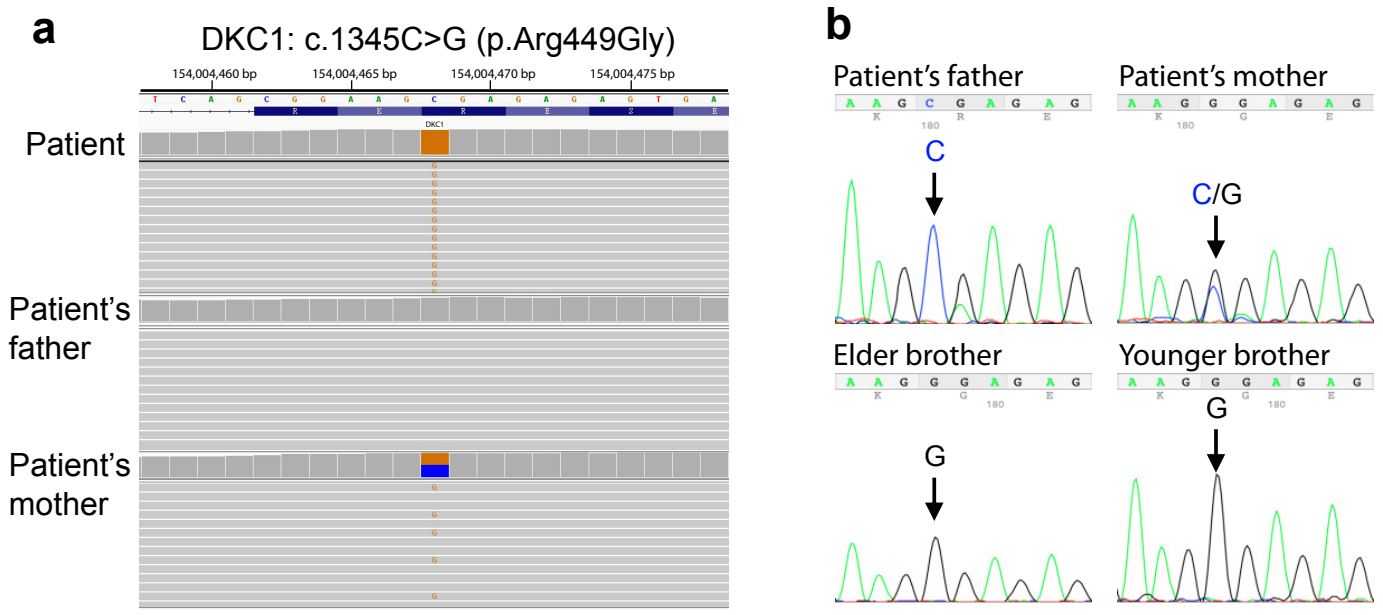

### Supplementary figure 1. Genomic characterization of our patients

**a.** Exome sequencing showing the inheritance of the DKC1 mutation from the mother to the sibling. **b.** Sanger sequencing of DKC1 gDNA prepared from PBMCs of all members of the family. The patient's father is indicated by C (normal). The patient's mother and sibling are indicated to have a DKC1 c.1345C> G (p. R449G) mutation.

# Supplementary Figure 2

**a**

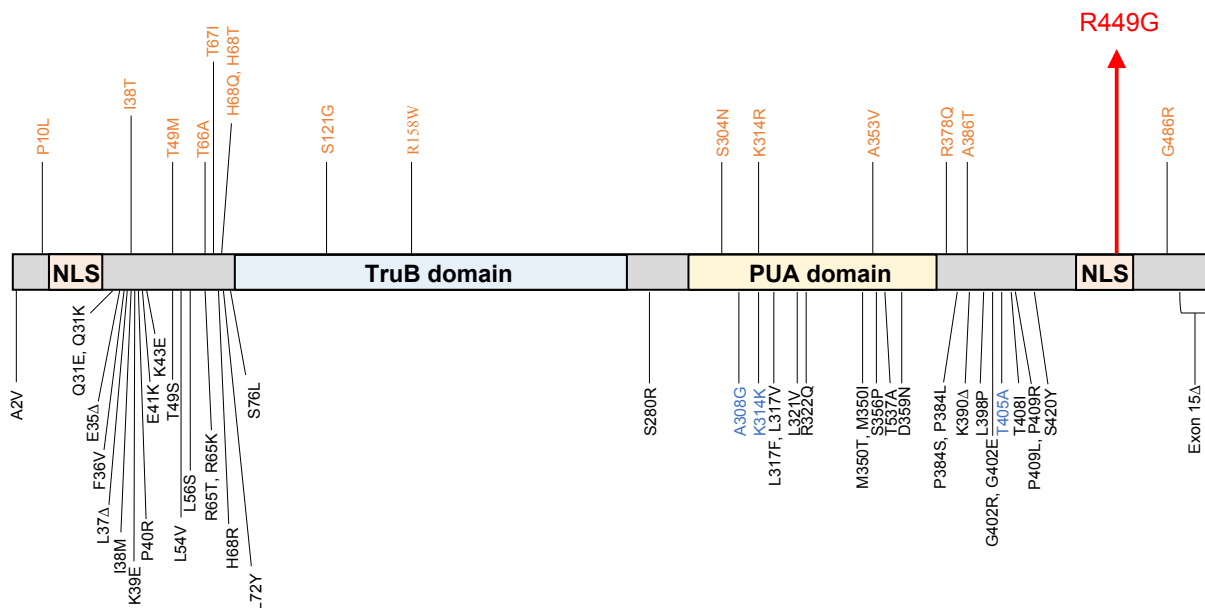

**b**

|    |        |              |                                     |     |
|----|--------|--------------|-------------------------------------|-----|
| SP | O60832 | DKC1_HUMAN   | -VVAEAAKTAKRKRESESESEDETTPPAA-----  | 462 |
| SP | Q9ESX5 | DKC1_MOUSE   | ----EAVNVIKRRDSESESEDETPTV-----     | 461 |
| SP | P40615 | DKC1_RAT     | -VTADAASIVKRRKRDSDSDADEATPTT-----   | 463 |
| TR | A7YWH5 | A7YWH5_BOVIN | -VVAEVVKTEKRRK--ESESEDTSPPAA-----   | 460 |
| SP | Q5ZJH9 | DKC1_CHICK   | -AVSEVERAPKRRKRESESENEAVSPPPSPATPPP | 463 |
| TR | F7C3C0 | F7C3C0_HORSE | KVVAEAVKAPKRRK--ESESEDTSPPVS-----   | 470 |
|    |        |              | .. **** :*: : .                     |     |

**NLS**

## Supplementary figure 2. DKC1 domain and conservation in different species

**a.** Schematic diagram of the DKC1 protein with known domains, including the nuclear localization signal (NLS). The R449G mutation identified in this study is indicated with a red arrow. NLS: nuclear localization; TruB (PUS) domain: pseudouridine synthase domain; PUA domain: pseudouridine synthases & archaeosine-specific transglycosylases domain.

**b.** Conservative analysis shows a high degree of conservation of the arginine 449-containing portion in the DKC1 protein from other species. Arginine 449 is highlighted. The red border indicates the nuclear localization signal.

# Supplementary Figure 3

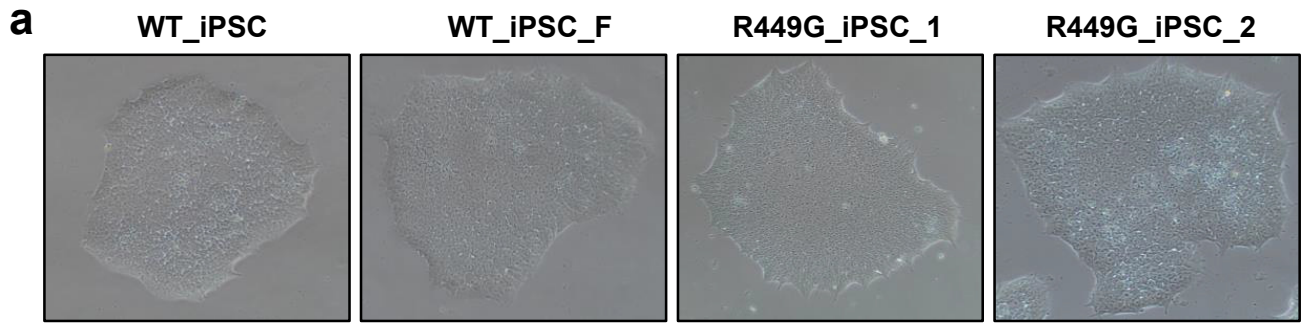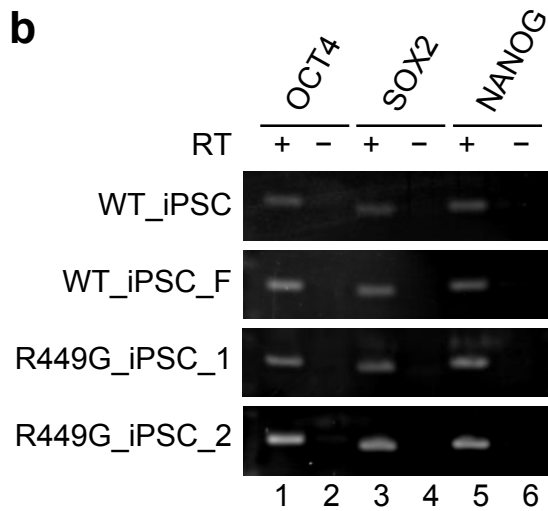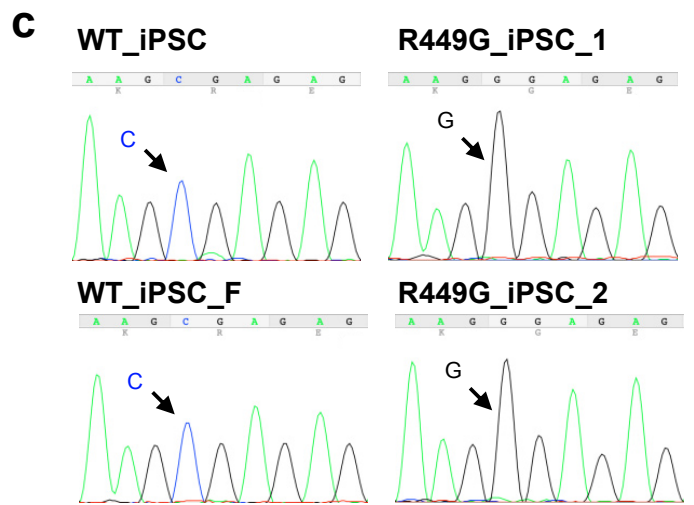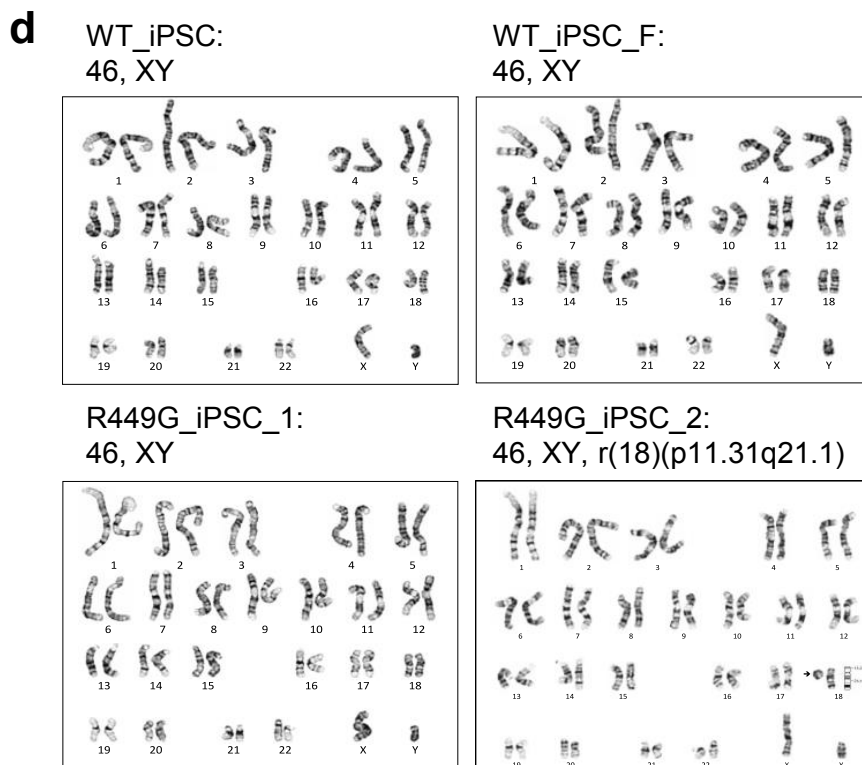

## Supplementary figure 3. Derivation and characterization of DKC1 mutant iPSCs

**a.** Bright-field images of WT\_iPSC, WT\_iPSC\_F, R449G\_iPSC\_1 and R449G\_iPSC\_2 cells. **b.** RT-PCR of pluripotency-associated gene expression in WT\_iPSC, WT\_iPSC\_F, R449G\_iPSC\_1 and R449G\_iPSC\_2 cells. **c.** Sanger sequencing of codons 1342–1350 of WT\_iPSC, WT\_iPSC\_F, R449G\_iPSC\_1 and R449G\_iPSC\_2 cells. c.1345C> G (p. R449G) mutation is indicated by the arrow. **d.** Metaphase G-banding karyotyping of iPSCs as indicated.



# Supplementary Figure 4

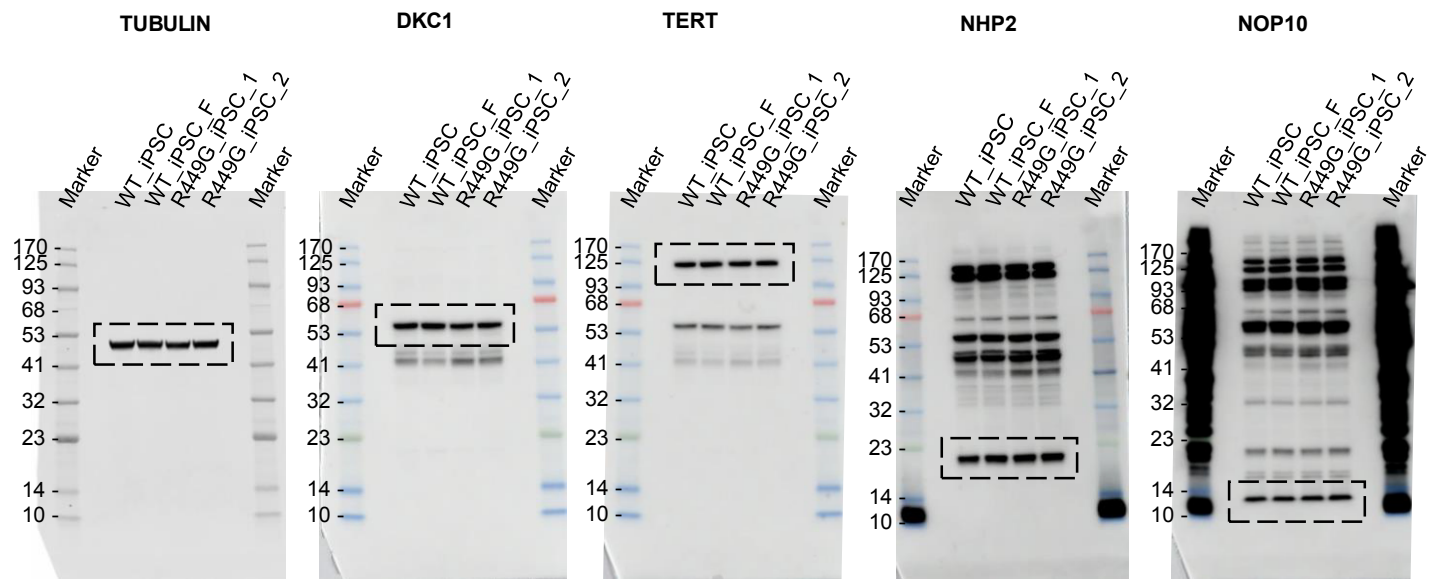

Supplementary Figure 4. Full blots of Figure 5b

# Supplementary Figure 5

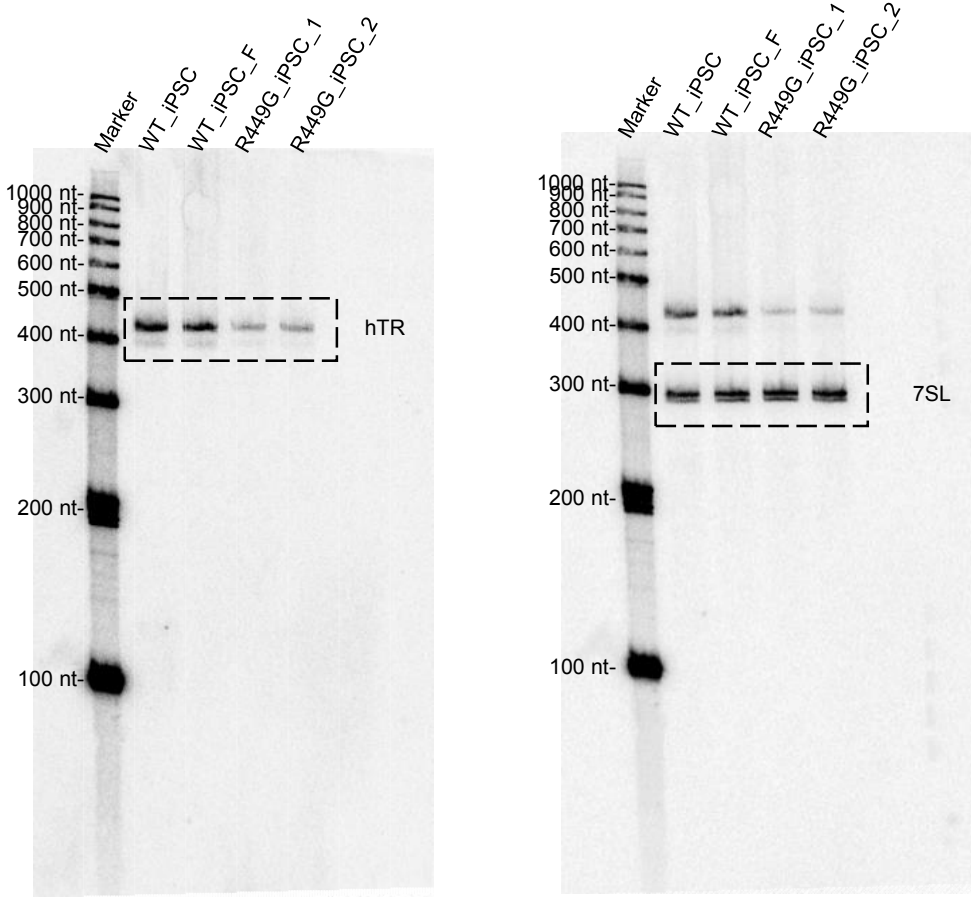

Supplementary Figure 5. Full blots of Figure 5c

# Supplementary Figure 6

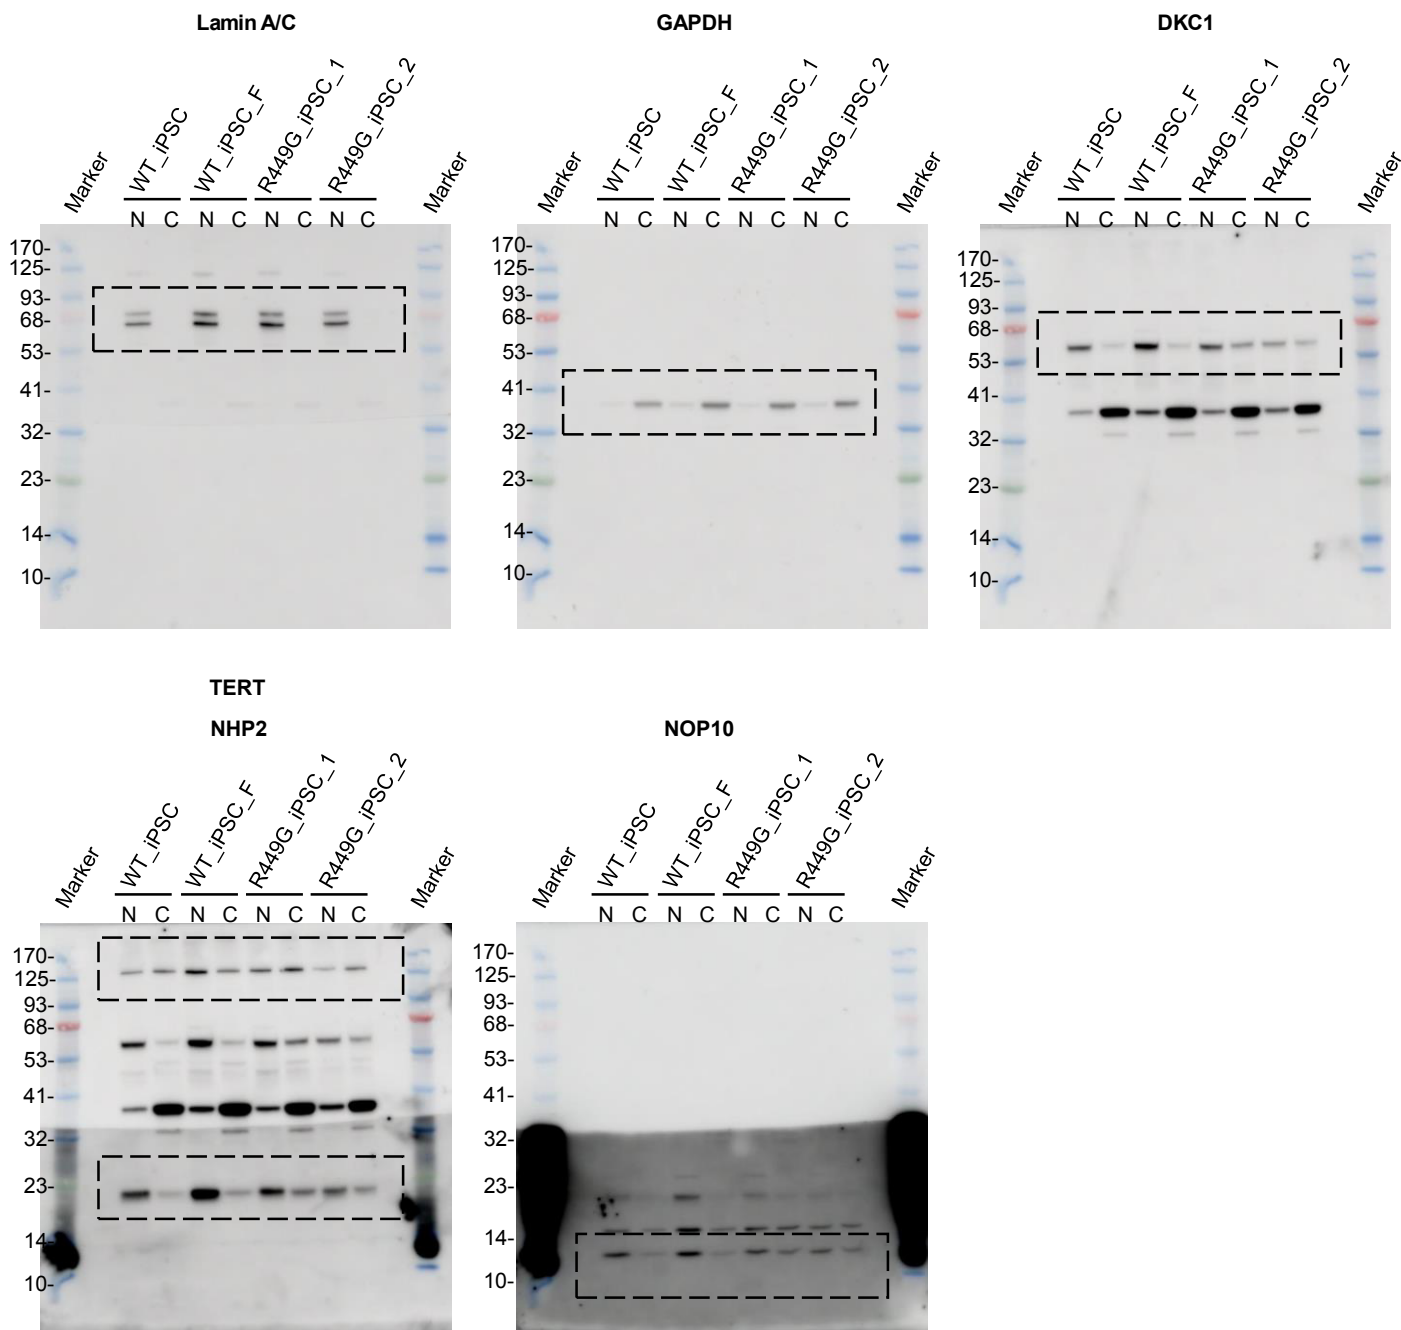

Supplementary Figure 6. Full blots of Figure 5e

# Supplementary Figure 7

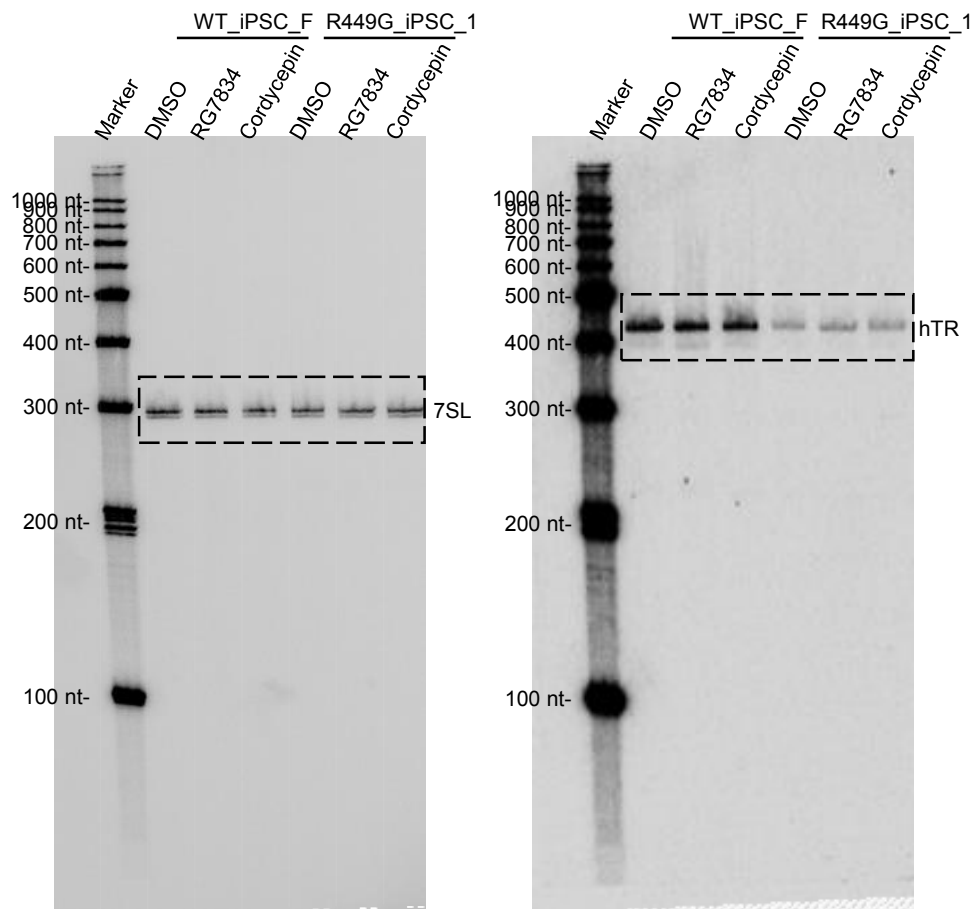

Supplementary Figure 7. Full blots of Figure 6a
